# Supplementary material for: Cross-sectional analysis of wound-associated soluble factors in early, established, and chronic wounds of recessive dystrophic epidermolysis bullosa patients
Source: Research Square preprint supplement (doi:10.21203/rs.3.rs-6263698/v1), 2025-04-07
Supplement: Supplementary file 1 [file bb054da59b2a501cebd0112b.docx]

**Supplementary materials**

**Distribution of samples by wound stage, patient age, gender, and location on the body**

**Distribution of wounds by location and wound stage**:

(location not listed for 1 sample)

**Distribution of wounds by gender:**

(gender not listed for 2 samples, wound stage not listed for 1 sample)

**Distribution of wounds and wound stages by patient age groups:**

(wound stage not listed for 1 sample, patient age not listed for 4 sample)
